# Supplementary material for: Impact of Mycobacterium tuberculosis complex lineages as a determinant of disease phenotypes from an immigrant rich moderate tuberculosis burden country
Source: Springer Nature journal article supplement (doi:10.1186/s12931-018-0966-x), 2018-12-01
Supplement: MOESM1 [file 16359754]

|    | Nationality  | EPTB | PTB  | Total | Goographical Origin  |
|----|--------------|------|------|-------|----------------------|
| 1  | Saudi        | 835  | 449  | 1284  | Saudi                |
| 2  | France       | 1    | 2    | 3     |                      |
| 3  | Poland       | 1    | 1    | 2     | Europe               |
| 4  | Romania      | 1    | 1    | 2     |                      |
| 5  | Czeck        | 2    | 1    | 3     |                      |
| 6  | USA          | 2    | 1    | 3     | America              |
| 7  | Ethiopia     | 8    | 31   | 39    |                      |
| 8  | Somalia      | 6    | 27   | 33    |                      |
| 9  | Chad         | 2    | 25   | 27    |                      |
| 10 | Sudan        | 3    | 23   | 26    | Africa               |
| 11 | Nigeria      | 3    | 20   | 23    |                      |
| 12 | Erytrea      | 3    | 16   | 19    |                      |
| 13 | Algeria      | 2    | 8    | 10    |                      |
| 14 | Libya        | 1    | 6    | 7     |                      |
| 15 | Senegal      | 3    | 5    | 8     |                      |
| 16 | Zambia       | 1    | 3    | 4     |                      |
| 17 | Morocco      | 3    | 6    | 9     |                      |
| 18 | Madagascar   | 1    | 7    | 8     |                      |
| 19 | SierraLeone  | 3    | 11   | 14    |                      |
| 20 | Cameroon     | 2    | 9    | 11    |                      |
| 21 | Ghana        | 2    | 8    | 10    |                      |
| 22 | Djibouti     | 2    | 5    | 7     |                      |
| 23 | South Africa | 1    | 3    | 4     |                      |
| 24 | Kenya        | 3    | 6    | 9     |                      |
| 25 | Egypt        | 5    | 12   | 17    |                      |
| 26 | Syria        | 3    | 8    | 11    | Middle East          |
| 27 | Lebanon      | 1    | 3    | 4     |                      |
| 28 | Yemen        | 11   | 28   | 39    |                      |
| 29 | Indonesia    | 26   | 90   | 116   |                      |
| 30 | Philippines  | 19   | 78   | 97    | South East Asia      |
| 31 | Malayasia    | 3    | 7    | 10    |                      |
| 32 | Vietnam      | 1    | 4    | 5     |                      |
| 33 | India        | 11   | 61   | 72    | Indian Sub-continent |
| 34 | Pakistan     | 18   | 56   | 74    |                      |
| 35 | Bangladesh   | 9    | 24   | 33    |                      |
| 36 | Srilanka     | 2    | 17   | 19    |                      |
| 37 | Nepal        | 1    | 10   | 11    |                      |
| 38 | Myanmar      | 1    | 8    | 9     |                      |
| 39 | Afghanistan  | 1    | 9    | 10    |                      |
|    |              | 1003 | 1089 | 2092  |                      |
