# Supplementary material for: Impact of Mycobacterium tuberculosis complex lineages as a determinant of disease phenotypes from an immigrant rich moderate tuberculosis burden country
Source: Springer Nature journal article supplement (doi:10.1186/s12931-018-0966-x), 2018-12-01

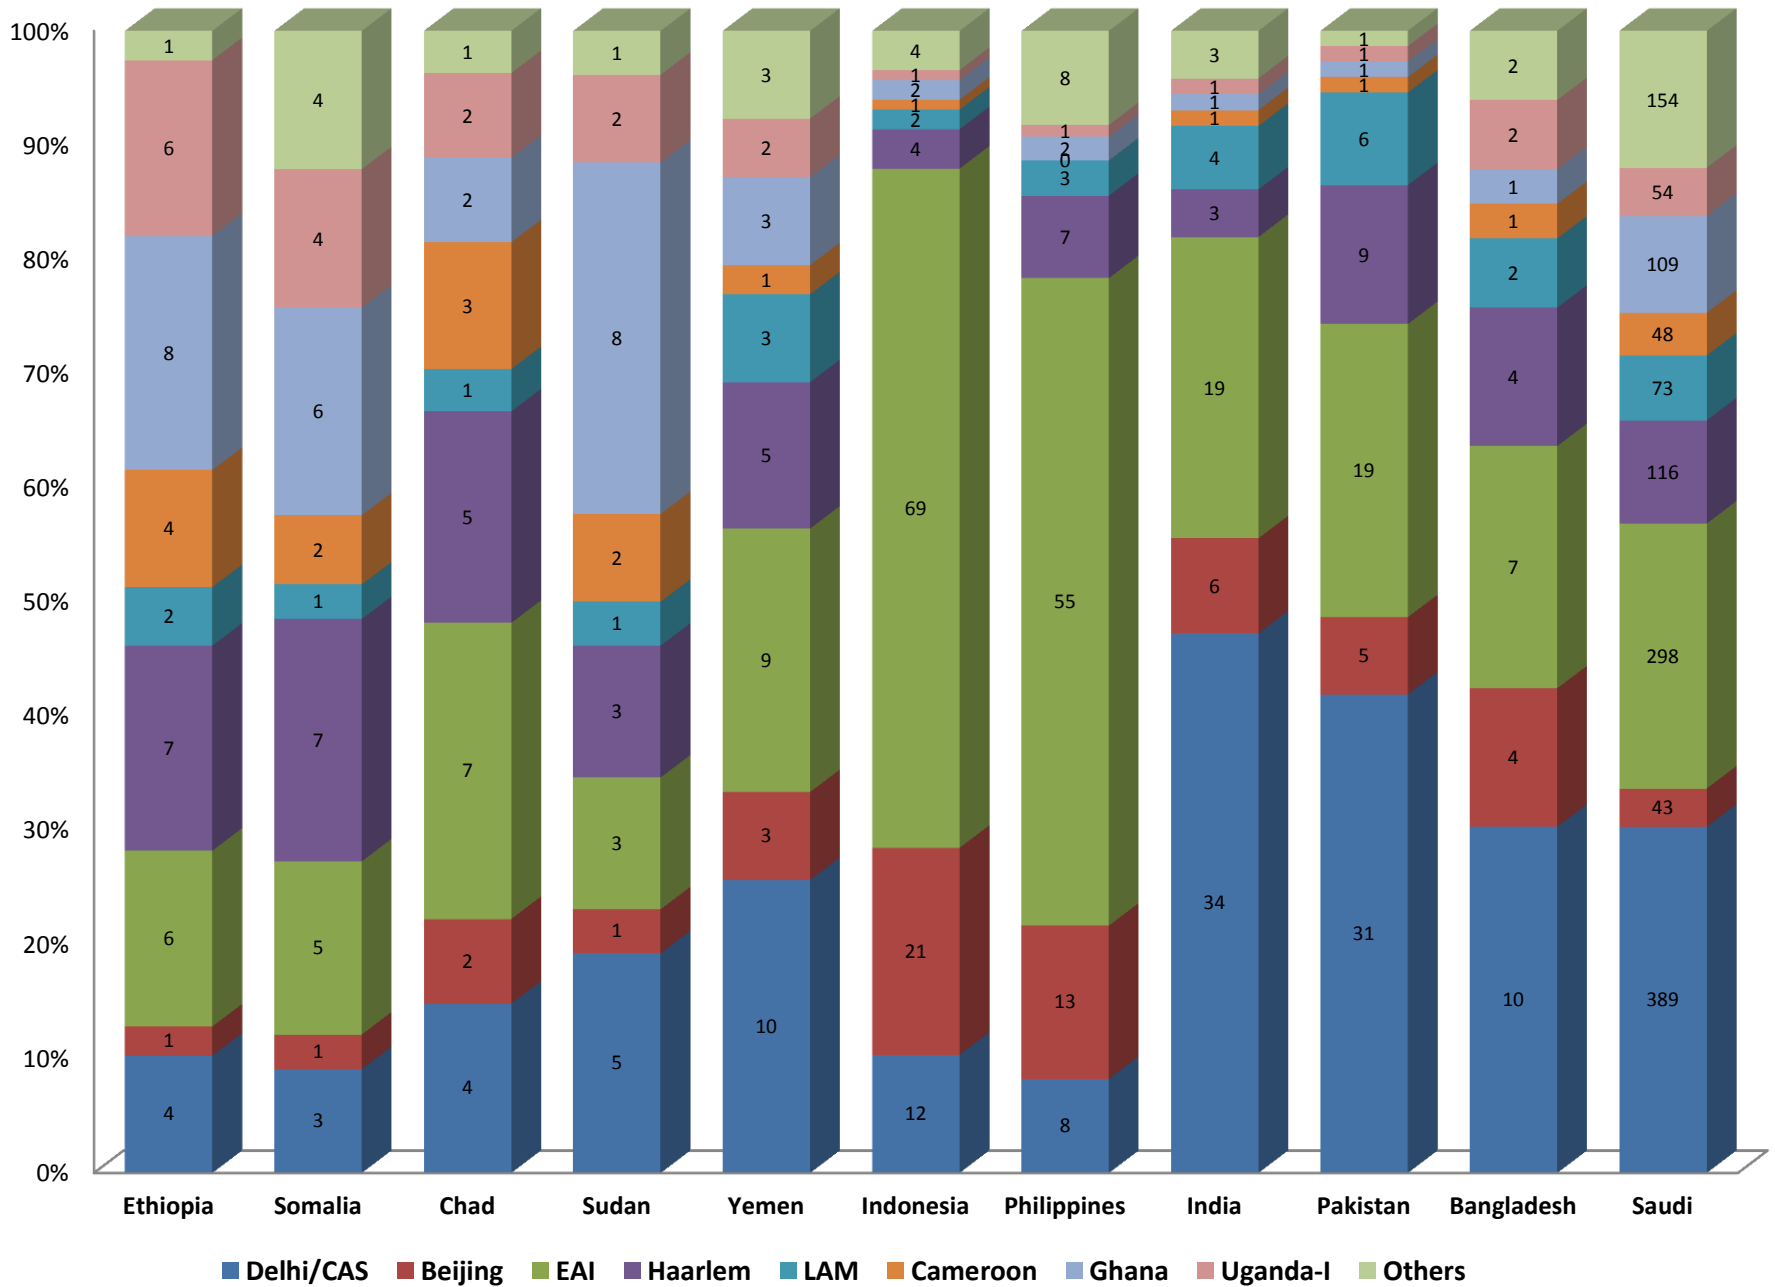

Supplement: MOESM2 [file 16359754]
