# Supplementary material for: Impact of Mycobacterium tuberculosis complex lineages as a determinant of disease phenotypes from an immigrant rich moderate tuberculosis burden country
Source: Springer Nature journal article supplement (doi:10.1186/s12931-018-0966-x), 2018-12-01
Supplement: MOESM3 [file 16359754]

**Supplementary Table-2: Correlation of major MTBC lineages and site of extrapulmonary infections.**

| Lineages                         | N (%)<br><a href="#">EPTB[1]</a><br>(N=1003) | Lymphnode<br>N=626 | OR(95% CI):p<br>value              | <a href="#">GITB[2]</a><br>N=168 | OR(95% CI):p<br>value            | <a href="#">CNSTB[3]</a><br>N=86 | OR(95% CI):p<br>value       | Bone &<br>joints<br>N=45 | OR(95%<br>CI):p value | <a href="#">UGTB[4]</a><br>N=41 | OR(95% CI):p<br>value | Others<br>N=37 |
|----------------------------------|----------------------------------------------|--------------------|------------------------------------|----------------------------------|----------------------------------|----------------------------------|-----------------------------|--------------------------|-----------------------|---------------------------------|-----------------------|----------------|
| <i>M.bovis</i>                   | 119(11.8)                                    | 105(16.8)          | <b>5.22(2.23-8.22):&lt;0.001</b>   | 8(4.8)                           | <b>0.33(0.085-0.567):0.001</b>   | -                                |                             | 3(6.7)                   | 0.52(0.16-1.69): 0.38 | 3(7.3)                          | 0.57(0.17-1.89): 0.22 | -              |
| <i>Delhi/CAS (Indo Oceanic)</i>  | 275(27.4)                                    | 145(23.2)          | <b>0.57(0.411-0.734):&lt;0.001</b> | 65(38.7)                         | <b>1.87(1.22-2.53):&lt;0.001</b> | 30(34.9)                         | 0.74(0.42-1.06): 0.18       | 13(28.9)                 | 1.07(0.37-1.79): 0.82 | 11(26.8)                        | 11.39(2.49-20.28)     | 11(29.7)       |
| <i>EAI (East African Indian)</i> | 158(15.7)                                    | 96(15.3)           | 0.92(0.59-1.24): 0.62              | 26(15.5)                         | 0.97(0.52-1.42): 0.91            | 14(16.3)                         | <b>1.98(0.76-3.19):0.04</b> | 8(17.8)                  | 1.16(0.79-1.53): 0.86 | 6(14.6)                         | 1.66(1.29-2.02): 0.39 | 8(21.6)        |
| <i>Beijing (East Asian)</i>      | 43(4.3)                                      | 31(4.9)            | 1.58(0.52-2.64): 0.24              | 3(1.8)                           | 0.36(0.11-1.18): 0.08            | 3(3.5)                           | 0.79(0.24-2.61)             | 2(4.4)                   | 1.04(0.24-4.44)       | 1(2.4)                          | 0.58(0.07-4.29)       | 3(8.1)         |
| <a href="#">Euro American[5]</a> | 400(39.8)                                    | 245(39.1)          | 0.92(0.79-1.19):0.54               | 66(39.3)                         | 0.97(0.69-1.36):0.86             | 37(43)                           | 1.15(0.74-1.80):0.53        | 18(40)                   | 1.00(0.55-1.85):0.88  | 20(48.8)                        | 1.48(0.78-2.72):0.24  | 15(40.5)       |
| <i>-Haarlem</i>                  | 75(7.5)                                      | 50(7.9)            | 1.22(0.61-1.83): 0.50              | 10(5.9)                          | 0.75(0.23-1.26): 0.51            | 7(8.1)                           | 1.10(0.20-200): 0.98        | 3(6.7)                   | 0.88(0.26-2.90)       | 2(4.9)                          | 0.62(0.15-2.63)       | 3(8.1)         |
| <i>-LAM</i>                      | 66(6.6)                                      | 43(6.9)            | 1.13(0.54-1.72): 0.73              | 8(4.8)                           | 0.67(0.16-1.18): 0.38            | 6(6.9)                           | 1.07(0.44-2.07): 0.88       | 4(8.9)                   | 1.41(0.48-4.06): 0.74 | 4(9.7)                          | 1.56(0.54-4.54)       | 1(2.7)         |
| <i>-Cameroon</i>                 | 49(4.9)                                      | 30(4.8)            | 0.95(0.39-1.51): 0.98              | 9(5.3)                           | 1.12(0.29-1.96): 0.90            | 7(8.1)                           | 1.84(0.31-3.38): 0.23       | 2(4.4)                   | 0.90(0.21-3.83)       | 1(2.4)                          | 0.47(0.06-3.53): 0.71 | -              |
| <i>-Ghana</i>                    | 68(6.8)                                      | 41(6.5)            | 1.94(0.97-2.92): 0.80              | 13(7.7)                          | 1.18(0.44-1.93): 0.71            | 5(5.8)                           | 0.84(0.05-1.62): 0.88       | 3(6.7)                   | 0.98(0.29-3.25)       | 3(7.3)                          | 1.09(0.32-3.62)       | 3(8.1)         |
| <i>-Uganda I</i>                 | 41(4.1)                                      | 22(3.5)            | 0.68(0.25-1.12): 0.31              | 6(3.6)                           | <b>2.41(0.77-4.06):0.02</b>      | 5(5.8)                           | 1.51(0.06-2.96): 0.57       | 3(6.7)                   | 1.73(0.51-5.83): 0.61 | 5(12.2)                         | 3.57(0.02-7.12): 0.06 | -              |
| <a href="#">Others[6]</a>        | 109(10.87)                                   | 53(7.34)           | -                                  | 20(11.9)                         | -                                | 9(10.5)                          | -                           | 7(15.5)                  | -                     | 5(12.2)                         | -                     | 8(21.6)        |

[1] Extrapulmonary tuberculosis

[2] Gastrointestinal tuberculosis

[3] Central nervous system tuberculosis

[4] Urogenital tuberculosis

[5] Lineages other than Delhi/CAS, EAI, Beijing, West African I and II and Bovis together grouped. Sub grouped to analyze 5 major clades

[6] Lineages including Uganda II, West African I and II, X, New-I, S, TUR and undefined lineages
